# Supplementary material for: Novel Model of Childhood Appetitive Traits in Children with Obesity
Source: PubMed Central journal article supplement (PMC11601821; doi:10.21203/rs.3.rs-5318259/v1), 2024-11-15
Supplement: NIHPPRS5318259v1-supplement-1.pdf [file NIHPPRS5318259v1-supplement-1.pdf]

## Supplementary Files

This is a list of supplementary files associated with this preprint. Click to download.

- [Table1.docx](#)
- [Table2.docx](#)
- [Supplemental.pdf](#)
